1       **Dynamic up- and down-regulation of the default (DMN) and extrinsic (EMN) mode**  
2                               **networks during alternating task-on and task-off periods**

3  
4       **Kenneth Hugdahl<sup>1,2,3</sup>, Justyna Beresiewicz<sup>1</sup>, Katarzyna Kazimierczak<sup>1</sup>, Kristiina**  
5       **Kompus<sup>1</sup>, Rene Westerhausen<sup>4</sup>, Lars Ersland<sup>5</sup>, Renate Grüner<sup>3,7</sup>, Karsten Specht<sup>1,6,7</sup>**

6       1) Department of Biological and Medical Psychology, University of Bergen, Norway

7       2) Division of Psychiatry, Haukeland University Hospital, Bergen, Norway

8       3) Department of Radiology, Haukeland University Hospital, Bergen, Norway

9       4) Institute of Psychology, University of Oslo, Norway

10      5) Department of Clinical Engineering, Haukeland University Hospital, Bergen, Norway

11      6) Department of Education, UiT/The Arctic University of Norway, Tromsø, Norway

12      7) Mohn Medical Imaging and Visualization Centre, Haukeland University Hospital,  
13      Bergen, Norway

14      **Address all correspondence** to Kenneth Hugdahl, Department of Biological and Medical  
15      Psychology, University of Bergen, Norway, email: [Hugdahl@uib.no](mailto:Hugdahl@uib.no), Phone: +47-  
16      55586277.

17      **Keywords:** Cortical networks, connectivity, default mode network, DMN, extrinsic mode  
18      network, EMN, auditory network, salience network

19

20

21

22

23 **Abstract**

24 Using fMRI, Hugdahl et al. (2015) reported the existence of a general-domain cortical  
25 network during active task-processing which was non-specific to the cognitive task being  
26 processed. They labelled this network the extrinsic mode network (EMN). The EMN would  
27 be predicted to be negatively, or anti-correlated with the classic default mode network  
28 (DMN), typically observed during periods of rest, such that while the EMN should be down-  
29 regulated and the DMN up-regulated in the absence of demands for task-processing, the  
30 reverse should occur when demands change from resting to task-processing. This would  
31 require alternating periods of task-processing and resting, and analyzing data continuously  
32 when demands change from active to passive periods and vice versa. We were particularly  
33 interested in how the networks interact in the critical transition points between conditions. For  
34 this purpose we used an auditory task with multiple cognitive demands in a standard fMRI  
35 block-design. Task-present (ON) blocks were alternated with an equal number of task-absent,  
36 or rest (OFF) blocks to capture network dynamics across time and changing environmental  
37 demands. To achieve this, we specified the onset of each block, and used a finite-impulse  
38 response function (FIR) as basis function for estimation of the fMRI-BOLD response. During  
39 active (ON) blocks, the results showed an initial rapid onset of activity in the EMN network,  
40 which remained throughout the period, and faded away during the first scan of the OFF-block.  
41 During OFF blocks, activity in the DMN network showed an initial time-lag where neither the  
42 EMN nor the DMN was active, after which the DMN was up-regulated. Studying network  
43 dynamics in alternating passive and active periods may provide new insights into brain  
44 network interaction and regulation.

45

46

47

48

## 49 **Introduction**

50 Applying an inclusive conjunction analysis to fMRI data from nine different studies with a  
51 total of 187 subjects, and comprising nine different cognitive tasks, Hugdahl et al. [1] found a  
52 generalized cortical network that was independent of the specifics of the individual task and  
53 cognitive processes. The authors labelled this the Extrinsic Mode Network (EMN), as a task  
54 non-specific network, with a fronto-temporo-parietal distribution, including the inferior and  
55 middle frontal gyri, inferior parietal lobule, supplementary motor area, and the inferior  
56 temporal gyrus. The EMN thus has a spatial architecture overlapping with what Fedorenko et  
57 al. [2] labelled the "cognitive flexibility network", and Duncan [3] labelled the "multiple  
58 demand network" (see also [4]). Common for all these networks is that they are suggested to  
59 be general-domain networks, i.e. they show up-regulation of activity across a range of  
60 cognitive tasks, e.g. [5], [6], [7], [8]. The general-domain networks further share  
61 characteristics with several domain-specific networks, such as the dorsal attention and  
62 salience networks [9], [10], [11], [12]), central executive network [13], [14], fronto-parietal  
63 network [15], and ventral attention network [16], see also Lee et al. [17], and Cabeza and  
64 Nyberg [18] for overviews. In the current study, we asked how the EMN as a general-domain  
65 network relates to the more known default mode network (DMN) [19], [20], [12], see also  
66 [21], [22], [23], [24], which is typically observed in the absence of specific tasks. It could be  
67 predicted that the DMN should be negatively, or anti- correlated with a general-domain  
68 network, like the EMN. This prediction is derived from previous findings that neuronal  
69 activity varies reciprocally between characteristic DMN- and task-positive network-areas,  
70 when studied under both resting-state [16], [25], [26], [23], and during active task conditions  
71 [27], [28], [29]. Lustig et al. [27] used alternating blocks of passive viewing of a fixation  
72 cross and active processing of a semantic judgement task. Results showed increased  
73 activations in the left frontal cortex during task-processing and deactivation in the same area

74 during passive fixation blocks. An opposite pattern was seen in the lateral parietal cortex, with  
75 deactivations during task processing. The study by Lustig et al. [27] therefore showed inverse  
76 activations and deactivations in brain areas linked to active task-processing compared to  
77 passive viewing. Following previous findings we therefore asked whether a similar  
78 relationship should hold for general-domain networks, and in particular for the EMN, when  
79 different cognitive tasks are alternated during the scanning session. Thus, we alternated brief  
80 periods with task presentations with brief periods of resting with no tasks present.

81 Conventional analysis of block-design data is to subtract activity during OFF-blocks from  
82 activity during ON-blocks, where the OFF-blocks act as a baseline control-condition (we  
83 leave out here the discussion in the literature whether the assumption of "pure insertions" in  
84 block-designs is a valid assumption or not, cf. [30]. The resulting activity pattern would thus  
85 reflect active task-processing. By subtracting activity obtained during task-processing ON-  
86 blocks from activity obtained during resting OFF-blocks, cf. [19], it should be possible to  
87 display activity that would be deactivated during task-processing blocks. We are not focusing  
88 here on whether task-positive and task-negative networks are anti-correlated per se in resting-  
89 state fMRI situations, cf. [31], [27], but on the time-dynamics of up- and down-regulations  
90 across the transitions between task-present and task-absent periods, with a focus on the  
91 interaction between the DMN and EMN networks. For this purpose, we used a finite-impulse  
92 response (FIR) function to model the BOLD response as implemented in the Statistical  
93 Parametric Mapping (SPM) analysis software (<https://www.fil.ion.ucl.ac.uk/spm/>). We re-  
94 analyzed fMRI data from >100 healthy individuals from a previous study in our laboratory  
95 [32], where the subjects had been tested with an auditory dichotic listening (DL) task with  
96 three instruction conditions that emphasized either perception [33], attention/vigilance [34] or  
97 executive control functions [35]. We chose this task because it reflects the changing cognitive  
98 demands and coping situations during an ordinary day, including both low-, perception, and

99 high-, executive control, level demands. The so called forced-attention DL paradigm was  
100 originally developed by Hugdahl and Andersson [34] for the study of the role of cognitive  
101 factors in auditory perception, and it has repeatedly been shown to produce valid and reliable  
102 results with regard to perception, attention and executive control, see e.g. [36], [37], [38],  
103 [39], [40], [41], [42], [43]. We now report how the EMN interact with the DMN within a  
104 single paradigm which included alternating task-presence (ON) and task-absence (OFF)  
105 periods, and with recurring and varying cognitive tasks and demands. Such an experimental  
106 design would be a novel way of capturing the dynamic interaction between passive rest and  
107 active processing periods, going beyond a fMRI "resting period" data acquisition approach. In  
108 order to capture the dynamics of network up- and down-regulation over time, and especially  
109 at the transition points between ON- and OFF-blocks, we specified the onset of each condition  
110 and used a 3s finite-impulse response function (FIR) as basis function for estimation of the  
111 BOLD response. This approach modelled each scan per task-ON- and task-OFF-block  
112 separately, which would allow an analysis of the fine-grained dynamics in the critical time-  
113 window when the situation switched from active to passive, and from passive to active time  
114 periods.

115

116

## 117 **Materials and Methods**

118

### 119 **Participants**

120 The participants were 104 healthy adults, with mean age of 29.3 years, standard deviation 8.3  
121 years. Approximately half of the participants were males, and half were females. The  
122 participants volunteered for participation, and further details can be found in [33]. The study  
123 was conducted according to the Declaration of Helsinki regarding ethical standards. The re-  
124 analyzed data had in addition previously been approved by the Regional Ethics Committee for

125 Medical Research in the Western Health Region of Norway (REK-Vest), and also been  
126 completely anonymized before the current analyses were made.

127

### 128 **Cognitive tasks**

129 The cognitive task was an auditory speech perception task, with repeated dichotic  
130 presentations of two different consonant-vowel (CV) syllables presented on each trial, one in  
131 the right ear and the other at the same time in the left ear. The participant is not told that there  
132 are two different sounds, one in each ear, on every trial. The baseline instruction to the  
133 participant was to report which syllable they perceived most clearly on each trial,  
134 emphasizing a single response, and with no instruction about allocation of attention to either  
135 the right or left ear. The task consists of repeated presentations of syllable-pair, using all  
136 combinations of the six stop-consonants /b/, /d/, /g/, /p/, /t/, /k/ paired with the vowel /a/,  
137 making up the CV-syllables /ba/, /ga/, /pa/, /da/, /ka/, /ta/. A trial could thus be the  
138 presentation of /ba/ in the left ear and simultaneously the syllable /pa/ in the right ear, see [36]  
139 for an overview of the dichotic listening task. The dichotic CV-syllable task has historically  
140 been used for the study of hemispheric asymmetry, which is reflected in the typical higher  
141 accuracy scores for reporting of the right ear stimulus, called a right-ear advantage (REA)  
142 [44], [35], [45], [46]. The paradigm has however also been used for the study of higher  
143 cognitive functions, like attention and executive control functions [47], [43], [48], [49], which  
144 Hugdahl and Andersson [33] labelled "the forced-attention" dichotic listening paradigm. In  
145 the latter case instructions to explicitly focus attention to and report from only the right or left  
146 ear is alternated between trial-blocks, and mixed with blocks of no-attention-focus instruction.  
147 A methodological advantage with the forced-attention variant is that it allows for the study of  
148 perception, attention and executive functions within the same experimental paradigm, by  
149 simply changing the instructions to the participants in the course of the experimental session,

150 see [35] for further examples. In the present fMRI-variant of the DL paradigm, each of the  
151 three instruction blocks (no instruction, instruction to focus on the right ear, instruction to  
152 focus on the left ear) were repeated three times during the session. The order of the  
153 presentation of the three conditions were pseudorandomized among the non-forced (NF),  
154 forced-right ear (FR), and forced-left ear (FL) instruction epochs. To approximate an every-  
155 day situation with brief processing and resting periods, the nine task-present epochs  
156 (ON-blocks) were alternated with nine resting epochs (OFF-blocks) with no stimuli or  
157 instruction present. Each ON- and OFF-block had a duration of 55 sec. Since the focus of the  
158 present study was the dynamic interaction of the EMN and DMN networks, we present data  
159 averaged across the three instruction conditions, since this will capture the conglomerate  
160 activity across the three cognitive tasks, to act as a proxy of for the fluctuations of cognitive  
161 demands experienced during the course of a day.

162

### 163 **MR imaging**

164 The MR scanner was a 3T GE SignaHDx scanner, and for the initial anatomical scanning, a  
165 T1 3D Fast Spoiled Gradient Recall sequence (FSPGR) was applied: TE = 14 ms, TR = 400  
166 ms, TI = 500 ms), with 188 consecutive sagittal slices (1 mm thick, no gap, scan matrix: 256 x  
167 256; FOV 256 mm). For the following echo-planar functional imaging (EPI), a sparse-  
168 sampling sequence was applied with TR of 5.5 sec, and with acquisition time (TA) of 1.5 sec,  
169 leaving a silent gap of 4 sec when the stimuli were presented, see [46]. 180 EPI-volumes  
170 were acquired, consisting of 25 axial slices in each volume (FOV: 220 mm; scan matrix 64 x  
171 64; 5 mm slice thickness, 0.5 mm gap; TE = 30 ms). There were 10 EPI-volume acquisitions,  
172 or scans, during each of the task-present and task-absent blocks, each of 55 sec. Total session  
173 time for the EPI-imaging part was thus  $(9 \times 55) \times 2 = 16.5$  min, with regularly alternating  
174 task-present and task-absent blocks.

175 **Statistical analysis and visualization of fMRI data**

176 The fMRI-data were analyzed with the SPM12 software package ((Wellcome Department of  
177 Cognitive Neurology, London, UK, <http://www.fil.ion.ucl.ac.uk/spm/>), following standard  
178 SPM settings. In brief, the raw DICOM images were converted to nifty-format, and pre-  
179 processed following SPM implanted routines for realignment and unwarping, normalizing the  
180 EPI-images to the MNI template, and smoothing with an 8 mm kernel. Thereafter, 1st-level  
181 analysis was performed, by specifying the onset of each condition and using a finite-impulse  
182 response function (FIR) as basis function, which modeled each scan per ON and OFF block  
183 separately, but averaged across repetitions of the same condition. The resulting beta-  
184 images/time-bins (TBs) (20 per condition, NF , FR, FL) were then used as input for the next,  
185 2nd-level analysis, which was defined as a 3 x 20 repeated measure ANOVA model, with the  
186 factor condition (NF, FR, FL) and the factor time-bin (TB) (1-20). This model allows  
187 exploring not only averaged bock-effects, mimicking “classical” ON-OFF contrasts, but also  
188 the temporal dynamics and time derivatives by specifying contrasts for each TB separately.  
189 (see Figure 1).

190 -----

191 Insert Figure 1 about here

192 -----

193 **Figure 1:** *Outline of the block-design with alternating ON-and OFF-periods with*  
194 *corresponding task-processing and resting, respectively. The time-line illustrates the*  
195 *specification of the separate time-bins (TB) for respective ON- and OFF-blocks, with the*  
196 *transition points between blocks marked with circles. The tables under the design illustrates*  
197 *the contrasts used in the analysis for the time-bin (left) and time-derivative (right) analyses,*  
198 *respectively (see text for further details).*

199



200 The following contrasts were specified: First, the average ON-OFF and OFF-ON contrasts  
201 were specified. Second, corresponding averaged TBs for the ON and OFF contrast were  
202 compared, i.e. TB1 ON against TB1 OFF, TB2 ON against TB2 OFF, etc, and repeated for  
203 the remaining eight pairs of time-bins, and t-contrasts were specified in both directions. Third,  
204 we explored the time-derivatives of the activity by contrasting averaged time-bins next to  
205 each other, i.e. TB1 against TB2, TB2 against TB3, etc, i.e., TB  $n$  against TB  $n+1$ . These  
206 latter contrasts will reveal consecutive significant changes from one TB to the next, i.e. from  
207 TB  $n$  to TB  $n+1$  as a “sliding window”. The “sliding window” contrast would be sensitive for  
208 picking up the time dynamics in the relative up- and down-regulation of the task-positive and  
209 task-negative networks, i.e. sensitive to the transition from the last TB for an ON-block to the  
210 first TB for an OFF-block, and vice versa (see Figure 1). If an activity remained unchanged  
211 from one TB to the next (as one would expect for adjacent TBs in the middle of a block), this  
212 contrast would not show anything. Again, both directions of contrasts were estimated, i.e.  
213 whether there was a significant increase or decrease from one TB to the next. For simplicity,  
214 differential effects between the three conditions (NF, FR, FL) were not explored, since the  
215 focus was on activity that were common across diverse cognitive tasks, cfr. [4], [2], [1].  
216 Results were explored for statistical significance, using a family-wise error (FWE)-corrected  
217 threshold level of  $p < .05$  in the main analyses, to protect against Type-I errors, and with at  
218 least 10 voxel per cluster.

219

## 220 **Results**

221 The results of the averaged ON-OFF contrast revealed the typical task-positive activity  
222 pattern with bilateral activity in the auditory cortex and surroundings, and of the task-positive,  
223 EMN, network [1] in the prefrontal cortex, including the anterior and middle cingulate cortex,  
224 supplementary motor area (SMA/preSMA), and thalamus. The opposite contrast revealed

225 areas, belonging to the task-negative, DMN, network [20], revealed significant activity in the  
226 precuneus, inferior parietal, and medial orbitofrontal areas, and in occipital areas (see Figure  
227 2b and Table 1b). This could be activity returning to baseline during resting periods, as  
228 previously found, see e.g. [20], or as a new finding with increases above baseline in situations  
229 with alternating task-negative and task-positive periods.

230 -----

231 Insert Figure 2a,b and Table 1a,b about here

232 -----

233 **Figure 2 (a,b):** Figure 2a shows BOLD activity for the ON – OFF contrast, thresholded at  
234 FEW .05, 10 voxels, in sagittal images through the entire brain volume, from “ear-to-ear”,  
235 rendered on an average MNI template. Figure 2b shows BOLD activity for the OFF-ON OFF  
236 contrast, thresholded at FEW .05, 10 voxels, in sagittal images through the entire brain  
237 volume, from “ear-to-ear”, rendered on an average MNI template.

### 238 **Table 1a**

239 Summary of significantly activated clusters (with local maxima), and peak voxel x, y, z  
240 coordinates and corresponding t- and z-values and AAL atlas anatomical localizations, for the  
241 OFF-ON contrast

| <b>Cluster size</b> | <b>Peak t-value</b> | <b>Peak z-value</b> | <b>X</b> | <b>Y</b> | <b>Z</b> | <b>Anatomical localization</b> |
|---------------------|---------------------|---------------------|----------|----------|----------|--------------------------------|
| 4356                | 17.07               | Inf                 | 60       | -21      | -3       | rSTG                           |
|                     | 15.78               | Inf                 | 57       | -12      | -6       | rSTG                           |
|                     | 14.02               | Inf                 | 45       | 15       | -6       | rInsula                        |
| 4145                | 16.48               | Inf                 | -60      | -15      | 0        | ISTG                           |
|                     | 16.44               | Inf                 | -60      | -24      | 3        | ISTG                           |
|                     | 14.76               | Inf                 | -60      | -39      | 9        | ISTG                           |
| 917                 | 15.11               | Inf                 | 0        | 6        | 60       | l/rSMA                         |
|                     | 13.31               | Inf                 | 3        | 18       | 47       | rSMA                           |
| 119                 | 6.85                | 6.78                | 0        | -27      | 6        | lThlmus                        |
|                     | 4.90                | 4.87                | -15      | -6       | 12       | lThlmus                        |

242

243

244

245 **Table 1b**

246 Summary of significantly activated clusters (with local maxima), and peak voxel x, y, z  
247 coordinates and corresponding t- and z-values and AAL atlas anatomical localizations, for the  
248 ON-OFF contrast

249

| <b>Cluster size</b> | <b>Peak t-value</b> | <b>Peak z-value</b> | <b>X</b> | <b>Y</b> | <b>Z</b> | <b>Anatomical localization</b> |
|---------------------|---------------------|---------------------|----------|----------|----------|--------------------------------|
| 7669                | 12.18               | inf                 | -9       | -57      | 15       | lPrecun                        |
|                     | 11.73               | inf                 | 12       | -54      | 18       | rPrecun                        |
|                     | 11.31               | inf                 | -3       | -63      | 21       | lPrecun                        |
| 972                 | 11.55               | inf                 | 6        | 51       | 0        | rSFG                           |
|                     | 11.51               | inf                 | -9       | 45       | 6        | lACC                           |
|                     | 10.93               | Inf                 | 12       | 39       | 6        | lSFG                           |
| 203                 | 8.44                | Inf                 | -24      | 24       | 45       | lSFG                           |
| 40                  | 5.56                | 5.52                | 27       | 27       | 45       | rMFG                           |

250

251 The differential, TB-wise contrasts are presented as activity changes rather than contrast-by-  
252 contrast activity. First, the temporal evolution of the task-positive networks, including the  
253 EMN network, was explored. As can be seen from Figure 3, the task-positive activity started  
254 with a strong visual activity, reflecting the on-screen instruction, followed by activity of the  
255 auditory and EMN network after about 5.5 sec (one time bin), which remained constant  
256 throughout the entire ON period and faded away during the first scan of the OFF block.  
257 Interestingly, the task-negative and DMN networks showed more dynamic changes than the  
258 task-positive and EMN networks. There was an initial time-lag of about 5.5 sec where neither  
259 the EMN nor the DMN or any other task-related networks was active. After this initial period,  
260 the DMN showed the strongest recurrence, which however faded away towards the end of the  
261 OFF block. The only activity that later evolved during the OFF blocks and remained  
262 throughout the block was the orbitofrontal recurrence. Figure 3 shows the overall activity  
263 including also line plots for the activity profiles from the posterior cingulate cortex and the  
264 right inferior frontal gyrus, representing hubs of the DMN and EMN networks, respectively.

265 -----

266 Insert Figure 3 about here

267 -----

268 **Figure 3:** *Figure 3 shows the corresponding axial glass brains for the ON- (upper row) and*  
269 *OFF-periods (lower row), and split for corresponding time-bins (TBs). The line-graphs in the*  
270 *middle of the figure show the development of the BOLD response across time for the ON (left*  
271 *side) and OFF (right side) period, respectively, and extracted from the posterior cingulate*  
272 *cortex (PCC) and inferior frontal gyrus (IFG), representing the default mode network (blue*  
273 *line, DMN) and extrinsic mode network (red line, EMN), respectively.*

274 When the time-derivative (TD) contrasts were explored, which reflect a significant increase or  
275 decrease of activity from one time-bin to the next, activity changes were observed only at the  
276 transitions between the blocks. When the ON block started (see Figure 4), the EMN switched  
277 on at once, together with the visual response to the instructions on the screen.

278 -----

279 Insert Figure 4 about here

280 -----

281 **Figure 4:** *Figure 4 shows the axial glass brains obtained from the time-derivative (TD)*  
282 *analysis during ON (left side) and OFF (right side) periods, separately for each time-*  
283 *derivative contrast, contrasting time-bin (TB)1 with TB2, TB2 with TB3 etc in a “sliding*  
284 *window” through all TBs (1-20). The upper row of glass brains show increases in activity, the*  
285 *lower row shows decreases in activity. See text for further details.*

286

287 However, the visual activity faded away over the first three TBs (cf. Logothetis et al., 2001),  
288 i.e. over the first 11-16.5 sec, while the auditory activity faded in from TB1 to TB2 and  
289 remained stable after that. At the end of the ON block, the auditory and articulatory motor  
290 activity rapidly disappeared in the transition from TB 10 to TB 11, with a remaining decrease

291 into TB 12 within the right planum temporale. Interestingly, the DMN was not observed in  
292 these time-derivatives-like contrasts, indicating that the DMN did not show a sharp onset of  
293 activity at the beginning of the OFF block, comparable to the EMN did at the beginning of the  
294 ON block. Neither EMN, nor DMN showed a sharp decrease of activity in this analysis.

295

296

## Discussion

297 To sum up the main findings, the ON- and OFF-blocks, corresponding to active task-  
298 processing versus passive resting, produced two orthogonal, non-overlapping activity patterns  
299 (see Figure 2). As is obvious from Figure 2, while task-present epochs resulted in a more  
300 anterior activity pattern, with the SMA/preSMA and the auditory cortices as the dominant  
301 activity regions, the task-absent epochs resulted in a more posterior activity pattern, including  
302 activity in the precuneus, and the parietal lobules as the dominant regions. These activity  
303 patterns would partially correspond to the EMN and DMM networks, respectively [1] [20].  
304 2001). The FIR analysis of the network dynamics based on time-derivative contrasts in  
305 addition revealed that the EMN showed a relatively sharp onset of the up-regulation at the  
306 beginning of the ON-blocks, while there was a more gradual up-regulation of the DMN  
307 during OFF-blocks. As expected, the DMN was more active during the OFF-blocks (see  
308 Figure 3), but no abrupt change was seen in the time-derivative analysis at the ON-OFF block  
309 intersections (see Figure 4). In their meta-analysis of nine PET blood-flow studies [19]) found  
310 significant decreases for the active minus passive task condition in cortical areas that today  
311 would qualify as the "classic" areas for the default mode network. One interpretation of the  
312 decreases in the Schulman et al. [19] study is that task-processing may inhibit activity in areas  
313 that otherwise would be tonically activated in the absence of a task, as was suggested by Popa  
314 et al. [50]. These authors used electrophysiology recordings and found that local field  
315 potential power was lower in anterior cingulum and retrosplenial cortex during task-OFF

316 compared to task-ON periods, while the reverse was found in somato-sensory association  
317 cortex and middle temporal gyrus. A further confirmation of this hypothesis would be if  
318 activity in approximately the same areas would be increased during passive resting periods in  
319 between active task processing periods, which the current results have shown. The areas  
320 showing decreased activity during active minus passive epochs in the Schulman et al. [19]  
321 study were primarily in the posterior cingulate/precuneus, dorsolateral and inferior frontal  
322 cortex, and in the inferior temporal gyrus (passive here meaning being exposed to the same  
323 stimulus, but without instruction to act on the stimulus). Approximately the same areas were  
324 activated in the present study, but now when subtracting active task-processing periods from  
325 activity during a resting period, which would confirm the hypothesis of inhibition of tonically  
326 active areas during phasic task-processing. Similarly, Schulman et al. [19] found increases in  
327 the visual cortex in the occipital lobe during active visual task processing, after averaging data  
328 from 10 different studies with visual tasks. This is paralleled in the present study which found  
329 corresponding increases in the auditory cortex in the temporal lobe to an auditory task.

330 Previous studies have shown that the DMN is still up-regulated during task-presence periods  
331 but attenuated or suspended compared to task-related activity, e.g [51], [52], [10]. Although  
332 the present findings are in line with these results, we cannot say if the corresponding networks  
333 were down-regulated or merely attenuated during reversals. An advantage with the present  
334 paradigm over previous paradigms that have been used, e.g. [53], [2], [54] is that the three  
335 different cognitive tasks were all embedded within the same experimental paradigm. The  
336 dichotic listening (DL) task is moreover exceptionally easy to understand and perform, so that  
337 the understanding of the task in itself does not require the allocation of additional cognitive  
338 resources which could confound task processing.

339

340 Figure 3 shows that the time-course for the task-positive EMN network followed a square-like  
341 trajectory, with a rapid initial up-regulation during ON-periods which peaked latest after  
342 about 11 sec (TB2), followed by a similarly rapid down-regulation during OFF-periods,  
343 peaking after about 22 sec (TB14). The corresponding trajectory for the task-negative DMN  
344 network showed a similar rapid down-regulation during ON-periods, peaking after about 22  
345 sec (TB4), while the up-regulation during OFF-periods were more gradual than for the EMN  
346 network, actually beginning already in the middle of the ON-period (see Figure 3). This could  
347 be an anticipatory effect of waiting for the "next task to be presented", and may represent an  
348 anticipatory shift of attention focus from task processing to resting, a kind of "readiness" for  
349 what is to come [55], which previously has been associated with alterations in EEG alpha-  
350 activity [56], [57]. A look at the time-course trajectories in Figure 3 shows a marked  
351 difference in the "gap" between the up-regulated and down-regulated network for ON versus  
352 OFF blocks. Although the two networks to a certain extent were down-regulated at about the  
353 same level, the level of up-regulation for the EMN was about twice the level of up-regulation  
354 for the DMN, which caused a gap difference between the two networks. The gap difference  
355 could reflect the additional increase in metabolism demands during active task-processing  
356 compared to resting. There was finally a delay for EMN up- and down-regulation of about 5.5  
357 sec, which may reflect the delay and slowness of the BOLD-response in itself [58], and not an  
358 effect of network interaction and interference.

359

360 **In conclusion**, the EMN and DMN networks seem to alternate with the same frequency as the  
361 switch from active task-periods (ON-blocks) to passive rest-periods (OFF-blocks) which  
362 alternated on a 55 sec basis. From recent work that the DMN may represent a unique state of  
363 the mind e.g. [59], [60], [61], [52], we now suggest that the DMN is a marker of an egocentric  
364 state of mind, while a task-positive network, like the extrinsic mode network (EMN) [1] is a

365 marker of an allostatic state of mind. These states dynamically fluctuate over time, such that  
366 the individual is either in one or the other state, with corresponding network activity being  
367 dominant in a particular state, and that this is mapped onto how environmental processing  
368 demands change over time. It may finally be suggested that the dynamic interaction between  
369 task-positive and task-negative networks may be disrupted in certain psychiatric and  
370 neurological disorders, extending what previously has been suggested for DMN abnormality  
371 [62], [63], [64]. We now suggest that what is abnormal in certain mental disorders may not be  
372 so much abnormality of a single network, but rather abnormality of network interaction and  
373 network dynamics, and that this is better captured in an experimental design with alternating  
374 task-ON and task-OFF periods, rather than a prolonged resting period during the scanning e.g.  
375 [65], [66], [67].

376

377 **Acknowledgements:** The authors want to thank Roger Barndon, Eva Øksnes, Turid  
378 Randa for running the MR scanner, and Merethe Nygård, Heidi van Wageningen, Kerstin  
379 von Plessen, and Margaretha Dramsdal for collecting the fMRI data that were used in the  
380 present study. We also thank Marcus E. Raichle, Washington University School of  
381 Medicine, USA, for constructive comments on earlier versions of the paper.

382 **Conflict of interest:** The authors declare no conflict of interest. The co-authors KH, LE,  
383 RG and KS own shares in the company NordicNeuroLab Inc., which produced the  
384 headphones used for the presentation of the auditory stimuli. These authors declare no  
385 conflict of interest.

386 **The present study was supported by grants** to Kenneth Hugdahl from European  
387 Research Council (ERC AdG #693124), the Western Norway Health Authorities (Helse-  
388 Vest, #912045), and the Research Council of Norway (NORMENT #223273)

389

390



391 **References**

392

393

394 [1] Hugdahl, K., Raichle, M. E., Mitra, A., Specht, K. (2015). On the existence of a

395 generalized non-specific task-dependent network. *Frontiers in Human Neuroscience*,

396 <http://dx.doi.org/10.3389/fnhum.2015.00430>.

397 [2] Fedorenko, E., Duncan, J., Kanwisher, N. (2013). Broad domain generality in focal

398 regions of frontal and parietal cortex. *PNAS*, 110, 16616-16621

399 [3] Duncan J (2010) The multiple-demand (MD) system of the primate brain: Mental

400 programs for intelligent behaviour. *Trends in Cognitive Sciences* 14, 172–179.

401 [4] Duncan, J.D., & Owen, A.M. (2000). Common regions of the human frontal lobe recruited

402 by diverse cognitive demands. *Trends in Neurosciences*, 23, 475-483.

403 [5] Corbetta, M., & Schulman, G.L. (2002). Control of goal-directed and stimulus-driven

404 attention in the brain. *Nature Reviews Neuroscience*, 3, 201 – 215.

405 [6] Dosenbach, N.U.F., Fair, D.D., Miezin, F.M., Cohen, A.L., Wenger, K.K., Dosenbach,

406 R.A.T., Fox, M.D., Snyder, A.Z., Vincent, J.L., Raichle, M.E., Schlaggar, B.L., Petersen, S.E.

407 (2007). Distinct brain networks for adaptive and stable task control in humans, *PNAS*, 104,

408 11073-11078

409 [7] Gratton, C., Laumann, T.O., Nielsen, A.N., Greene, D.J., Gordon, E.M., Gilmore, A.W.,

410 Nelson, S.M., Coalson, R.S., Snyder, A.Z., Schlaggar, B.L., *et al.* (2018). Functional brain

411 networks are dominated by stable group and individual factors, not cognitive or daily

412 variation. *Neuron* 98, 439-452 e435.

413 [8] Gonzalez-Castillo, J., Saad, Z.S., Handwerker, D.A., Inati, S.J., Brenowitz, N., and

414 Bandettini, P.A. (2012). Whole-brain, time-locked activation with simple tasks revealed using

415 massive averaging and model-free analysis. *PNAS*, 109, 5487-5492.

- 416 [9] Corbetta, M., Patel, G., Schulman, G.L. (2008). The reorienting system of the human  
417 brain: from environment to theory of mind. *Neuron*, 58, 306-324.
- 418 Smallwood, J., Tipper, C., Brown, K., Baird, B., Engen, H., Michaels, J.R., Grafton, S.,  
419 Schooler, J.W., (2013). Escaping the here and now: Evidence for a role of the default mode  
420 network in perceptually decoupled thought, *Neuroimage*, 69, 120-125.
- 421 [10] Greicus, M.D., Krasnow, B., Reiss, A.L., Menon, V. (2003). Functional connectivity in  
422 the resting brain: A network analysis of the default mode hypothesis. *PNAS*, 100, 253-258.
- 423 [11] Downar, J., Crawley, A.P., Mikulis, D.J., eDavis, K.D. (2002). A cortical network  
424 sensitive to stimulus salience in a neutral behavioral context across multiple sensory  
425 modalities. *Journal of Neurophysiology*, 87, 615-20.
- 426 [12] Raichle, M. (2010). Two views on brain function. *Trends in Cognitive Sciences*, 14, 180-  
427 190.
- 428 [13] Bressler, S.L, & Menon, V. (2010). Large-scale brain networks in cognition: emerging  
429 methods and principles. *Trends in Cognitive Sciences*, 14(6), 277-290.
- 430 [14] Power, J. D, & Petersen, S.E. (2013). Control-related systems in the human brain.  
431 *Current Opinion in Neurobiology*, 2, 223-228.
- 432 [15] Lee, M.H., Hacker, C.D., Snyder, A.Z., Corbetta, M., Zhang, D., Leuthardt, E.C.,  
433 Shimony, J.S. (2012). Clustering of resting state networks, *PlosOne*, 7,  
434 10.1371/journal.pone.0040370.
- 435 [16] Fox, M.D., Snyder, A.Z., Vincent, J.L., Corbetta, M., Van Essen, D.C., Raichle, M.E.  
436 (2005). The human brain is intrinsically organized into dynamic, anticorrelated functional  
437 networks. *PNAS*, 102, 9673–9678.
- 438 [17] Lee, M.H. Lee, Smyser, C.D., Shimony, J.S. (2013). Resting-State fMRI: A Review of  
439 Methods and Clinical Applications. *American Journal of Neuroradiology*, 34, 1866-1872
- 440 [18] Cabeza, R., and Nyberg, L. (2000). Imaging cognition II: An empirical review of 275  
441 PET and fMRI studies. *Journal of Cognitive Neuroscience*, 12, 1-47.

- 442 [19] Shulman, G.L., Fiez, J.A., Corbetta, M., Buckner, R.L., Miezin, F.M., Raichle, M.E., et  
443 al. (1997). Common blood flow changes across visual tasks: II. Decreases in cerebral cortex.  
444 *Journal of Cognitive Neuroscience*, 9, 648–663.
- 445 [20] Raichle, M.E., Macleod, A.M., Snyder, A.Z., Powers, W.J., Gusnard, D.A., Shulman,  
446 G.L. (2001). A default mode of brain function. *PNAS*, 98, 676-682.
- 447 [21] Buckner, Randy L, Andrews- Hanna, Jessica R, & Schacter, Daniel L. (2008). The  
448 brain's default network. *Annals of the New York Academy of Sciences*, 1124, 1-38.
- 449 [22] Buckner, R.L. (2012). The serendipitous discovery of the brain's default network.  
450 *Neuroimage*, 62, 1137-1145.
- 451 [23] Mitra, A., Raichle, M.E. (2018). Principles of cross-network communication in human  
452 resting state fMRI. *Scandinavian Journal of Psychology*, 59, 83-90.
- 453 [24] Mak, L. E., Minuzzi, L., MacQueen, G., Hall, G., Kennedy, S.H., Milev, R. (2017). The  
454 default mode network in healthy individuals: A systematic review and meta-analysis. *Brain*  
455 *Connect*, 7, <https://doi.org/10.1089/brain.2016.0438>
- 456 [25] Gao, W., & Lin, W. (2012). Frontal parietal control network regulates the anti-correlated  
457 default and dorsal attention networks. *Human Brain Mapping*, 33, 192 – 202.
- 458 [26] Mitra, A. & Raichle, M.E., (2016). How networks communicate: Propagation patterns in  
459 spontaneous brain activity. *Philosophical Transactions of the Royal Society, London B*, 371,  
460 doi: 10.1098/rstb.2015.0546.
- 461 [27] Lustig, C., Snyder, A.Z., Bhakta, M., O'Brien, K.C., McAvoy, M., Raichle, M.E. (2003).  
462 Functional deactivations: Change with age and dementia of the Alzheimer type, *PNAS*, 100,  
463 14504-14509.
- 464 [28] Ramot, M., Fisch, L., Harel, M., Kipervasser, S., Andelman, F., Neufeld, M.Y., Kramer,  
465 U., Fried, I., and Malach, R. (2012). A widely distributed spectral signature of task-negative

- 466 electrocorticography responses revealed during a visuomotor task in the human cortex.  
467 *Journal of Neuroscience*, 32, 10458-10469.
- 468 [29] Sridharan, D., Levitin, D.J., and Menon, V. (2008). A critical role for the right fronto-  
469 insular cortex in switching between central-executive and default-mode networks. *PNAS*,  
470 105, 12569-12574.
- 471 [30] Posner, M. I., & Raichle, M. E. (1997). *Images of mind*. New York: Freeman & co.
- 472 [31] Mittner, M., Boekel, W., Tucker, A.M., Turner, B.M., Heathcote, A., Forstmann, B.U.  
473 (2014). When the brain takes a break: A model-based analysis of mind wandering, *The*  
474 *Journal of Neuroscience*, 34, 16286 – 16295.
- 475 [32] Kompus K, Specht K, Erslund L, Juvodden HT, van Wagneningen H, Hugdahl K,  
476 Westerhausen R. (2012). A forced-attention dichotic listening fMRI study on 113 subjects.  
477 *Brain and Language*, 121, 240-247.
- 478 [33] Hugdahl, K., & Andersson, L. (1986). The "forced-attention paradigm" in dichotic  
479 listening to CV-syllables: A comparison between adults and children. *Cortex*, 22, 417-432.
- 480 [34] Asbjørnsen, A., & Hugdahl, K. (1995). Attentional effects in dichotic listening. *Brain and*  
481 *Language*, 49, 189-201.
- 482 [35] Hugdahl, K., Westerhausen, R., Alho, K., Medvedev, S., Laine, M., & Hämäläinen. H.  
483 (2009). Attention and cognitive control: Unfolding the dichotic listening story. *Scandinavian*  
484 *Journal of Psychology*, 50, 11-22.
- 485 [36] Obrzut, J.E., Mondor, T.A., Uecker, A. (1993). The influence of attention on the dichotic  
486 REA with normal and learning disabled children. *Neuropsychologia*, 31, 1411-1416.
- 487 [37] Gadea, M., Gomez, C., Espert, R. (2000). Test-retest performance for the consonant-  
488 vowel dichotic listening test with and without attentional manipulations. *Journal of Clinical*  
489 *and Experimental Neuropsychology*, 22, 793-803.

- 490 [38] Helland, T., & Asbjørnsen, A. (2000). Executive functions in dyslexia. *Child*  
491 *Neuropsychology*, 6, 37-46.
- 492 [39] Tallus, J., Soveri, A., Hämäläinen, H., eTuomainen, J., Laine, M. (2015). Effects of  
493 auditory attention training with the dichotic listening task: Behavioural and  
494 neurophysiological evidence, *PlosOne*, 6, 10, e0139318. doi: 10.1371/journal.pone.0139318.  
495 eCollection.
- 496 [40] Kershner, J.R. (2016). Forced-attention dichotic listening with university students with  
497 dyslexia: Search for a core deficit. *Journal of Learning Disabilities* 2016, Vol. 49(3) 282–292
- 498 [41] O'Leary, D., Andreasen, N. C., Hurtig, R. R., Hichwa, R. D., Watkins, L., Boles Ponto, L. L.,  
499 Rogers, M., & Kirchner, P. T. (1997). A positron emission tomography study of binaurally and  
500 dichotically presented stimuli: Effects of level of language and directed attention. *Brain and Language*,  
501 53, 20-39.
- 502 [42] Hugdahl, K., Law, I., Kyllingsbæk, S., Brønneck, K., Gade, A., & Paulson, O. B. (2000).  
503 Effects of attention on dichotic listening: An <sup>15</sup>O-PET study. *Human Brain Mapping*, 10, 87-97.
- 504 [43] Westerhausen, R., Moosmann, M., Alho, K., Belsby, S.O., Hämäläinen, H., Medvedev,  
505 S., Specht, K., & Hugdahl, K. (2010). Identification of attention and cognitive control  
506 networks in a parametric auditory fMRI study. *Neuropsychologia*, 48, 2075-2081
- 507 [44] Shankweiler, D., & Studdert-Kennedy, M. (1967). Identification of consonants and  
508 vowels presented to left and right ears. *Quarterly Journal of Experimental Psychology*, 19, 59-  
509 63.
- 510 [45] Hugdahl, K. (2011). Fifty years of dichotic listening research - Still going and going and  
511 going.... *Brain and Cognition*, 76, 211-214.
- 512 [46] Van den Noort, M., Specht, K., Rimol, LM, Ersland, L., & Hugdahl, K. (2008) A new  
513 verbal reports fMRI dichotic listening paradigm for studies of hemispheric asymmetry.  
514 *Neuroimage*, 40, 902-911.

- 515 [47] Bryden, M.P., Munhall, K., & Allard, F. (1983). Attentional biases and the right-ear  
516 effect in dichotic listening. *Brain and Language*, 18, 236-248.
- 517 [48] Hommet, C, Mondon, K., Berrut, G, Goyer, Y., Isingrini, M., Constans, T, Beizung, C.  
518 (2011). Central auditory processing in aging: the dichotic listening paradigm. *Journal of*  
519 *Nutrition in Health and Aging*, 14, 751-756.
- 520 [49] Gadea, M., Alino, M., garijo, E., Espert, R, Salvador, A, (2016). Testing the benefits of  
521 neurofeedback on selective attention measured through dichotic listening, *Applied*  
522 *Psychophysiology and Biofeedback*, 41, 157-164.
- 523 [50] Popa, D., Popescu, A.T., and Pare, D. (2009). Contrasting activity profile of two  
524 distributed cortical networks as a function of attentional demands. *Journal of Neuroscience*  
525 29, 1191-1201.
- 526 [51] Fransson, P. (2006). How default is the default mode of brain function? Further evidence  
527 from intrinsic BOLD signal fluctuations. *Neuropsychologia*, 44, 2836–2845.
- 528 [52] Sormaz, M., Murphy, C., Wang, H-t., Hymers, M., Karapanagiotidis, T., Poerio, G.,  
529 Margulies, D.S., Jefferies, E., Smallwood, J. (2018). Default mode network can support the  
530 level of detail in experience during active task states, *PNAS*, 115, 9318-9323.
- 531 [53] Fedorenko, E., Behr, M. K., Kanwisher, N. (2011). Functional specificity for high-level  
532 linguistic processing in the human brain. *PNAS*, 108, 16428-16433.
- 533 [54] Bush, G., Shin, L.M. (2006). the multi-source interference task: An fMRI task that  
534 reliably activates the cingulo-frontal-parietal cognitive/attention network. *nature Protocols*, 1,  
535 308-313.
- 536 [55] Posner, M.I. & Rothbart, M.K. (2007). eResearch on attention networks as a model for  
537 the integration of psychological science. *Annual Review Psychology*, 58, 1-23

- 538 [56] Sauseng, P., Klimesch, W., Stadler, W., Schabus, M., Doppelmayr, M., Hanslmayr, S.,  
539 Gruber, W.R.,Birbaumer, N. (2005). A shift of visual spatial attention is selectively associated  
540 with human EEG alpha activity. *European Journal of Neuroscience*, 22, 2917–2926.
- 541 [57] Sauseng, P., Klimesch, W.e, Freunberger, R, Pecherstorfer,T.e, Hanslmayr, S.,  
542 Doppelmayre, M. (2006). Relevance of EEG alpha and theta oscillations during task  
543 switching. *Experimental Brain Research*, 170, 295-301.
- 544 [58] Bandettini, P. A. (1999). The temporal resolution of Functional MRI. In C. T. W.  
545 Moonen & P. A. Bandettini (Eds.), *Functional MRI*. Berlin: Springer Verlag.
- 546 [59] Callard, F., Smallwood, J., and Margulies, D.S. (2012). Default Positions: How  
547 Neuroscience's Historical Legacy has Hampered Investigation of the Resting Mind. *Frontiers*  
548 *in Psychology* 3, 321.
- 549 [60] Margulies, D.S. Ghosh, S.S.,Goulas, A., Falkiewicz, F., Huntenburg, J.M., Langs,  
550 G.,Bezgin, G., Eickhoff, S.B., Castellanos, F.X., Petrides, M., Jefferies, E., Smallwood,  
551 J.(2016). Situating the default-mode network along a principal gradient of macroscale cortical  
552 organization. *PNAS*, 113, 12574-12579
- 553 [61] Margulies, D.S., and Smallwood, J. (2017). Converging evidence for the role of  
554 transmodal cortex in cognition. *PNAS*, 114, 12641-12643.
- 555 [62] Sorg, C., Riedl, V., Mühlau, M., Calhoun, V.D., Eichele, T., Drzezga, A., Förstl, H., Kurz,  
556 A., Zimmer, C., Wohlschläger, A.M. (2007). Selective changes of resting-state networks in  
557 individuals at risk for Alzheimer's disease. *PNAS*, 104, 18760-18765.
- 558 [63] Northoff, G., & Qin, P. (2011). How can the brain's resting state activity generate  
559 hallucinations? A 'resting state hypothesis' of auditory verbal hallucinations. *Schizophrenia*  
560 *Research*, 127, 202-214.
- 561 [64] Nygård, M., Eichele, T, Løberg, E-M., Jørgensen, H, Johnsen, E, Kroken, R, Berle, Ø,  
562 Hugdahl, K. (2012). Patients with schizophrenia fail to up-regulate task-positive and down-

563 regulate task-negative brain networks: An fMRI study using an ICA analysis approach.  
564 *Frontiers in Human Neuroscience*, doi:103389.fnhum.2012.00149  
565 [65] Van Dijk, K. R., Hedden, T., Venkataraman, A., Evans, K. C., Lazar, S. W., & Buckner,  
566 R. L. (2009). Intrinsic functional connectivity as a tool for human connectomics: theory,  
567 properties, and optimization. *Journal of Neurophysiology*, 103, 297-321.  
568 [66] Cole, D. M., Smith, S. M., & Beckmann, C. F. (2010). Advances and pitfalls in the  
569 analysis and interpretation of resting-state fMRI data. *Frontiers in Systems Neuroscience*, 4,8.  
570 [67] Di, X & Biswal, B.B. (2014). Modulatory interactions between the default mode network  
571 and task positive networks in resting state. *PeerJ*, DOI 10.7717/peerj.367.



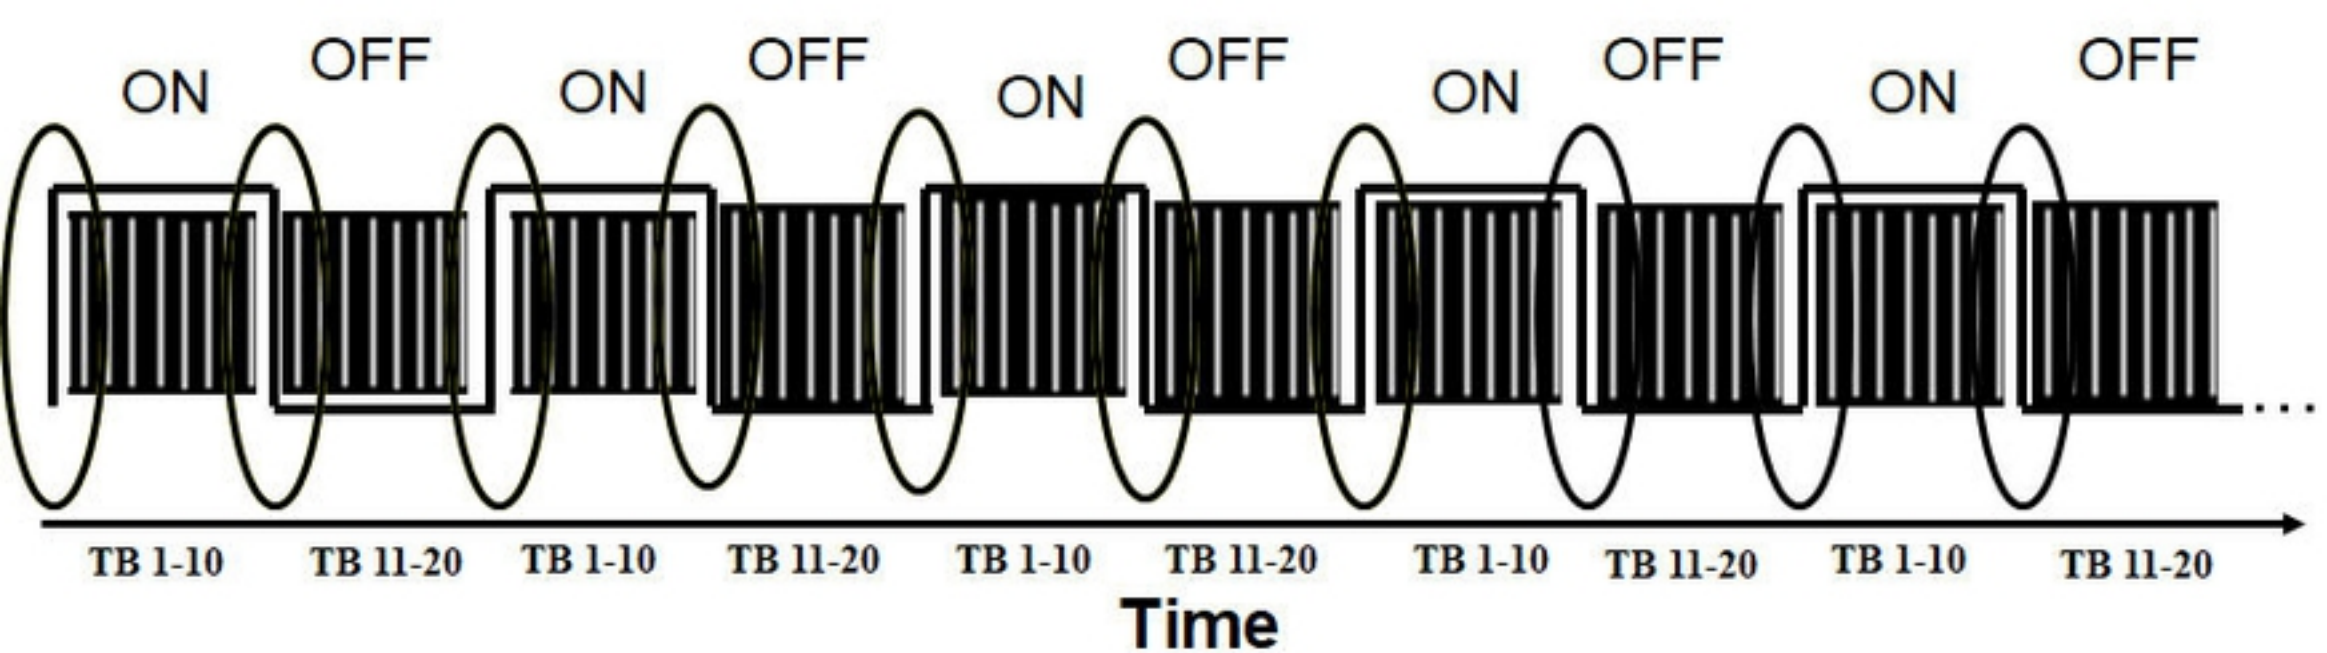

$[1\ 0\ 0\ 0\ 0\ 0\ 0\ 0\ 0\ 0\ 0]$   $[-1\ 0\ 0\ 0\ 0\ 0\ 0\ 0\ 0\ 0\ 0]$   
 $[0\ 1\ 0\ 0\ 0\ 0\ 0\ 0\ 0\ 0\ 0]$   $[0\ -1\ 0\ 0\ 0\ 0\ 0\ 0\ 0\ 0\ 0]$   
 $[0\ 0\ 1\ 0\ 0\ 0\ 0\ 0\ 0\ 0\ 0]$   $[0\ 0\ -1\ 0\ 0\ 0\ 0\ 0\ 0\ 0\ 0]$   
 $[0\ 0\ 0\ 1\ 0\ 0\ 0\ 0\ 0\ 0\ 0]$   $[0\ 0\ 0\ -1\ 0\ 0\ 0\ 0\ 0\ 0\ 0]$   
 ...  
 $[0\ 0\ 0\ 0\ 0\ 0\ 0\ 0\ 0\ 0\ 1]$   $[0\ 0\ 0\ 0\ 0\ 0\ 0\ 0\ 0\ 0\ -1]$

$[1\ -1\ 0\ 0\ 0\ 0\ 0\ 0\ 0\ 0\ 0]$   $[0\ 0\ 0\ 0\ 0\ 0\ 0\ 0\ 0\ 0\ 0]$   
 $[0\ 1\ -1\ 0\ 0\ 0\ 0\ 0\ 0\ 0\ 0]$   $[0\ 0\ 0\ 0\ 0\ 0\ 0\ 0\ 0\ 0\ 0]$   
 $[0\ 0\ 1\ -1\ 0\ 0\ 0\ 0\ 0\ 0\ 0]$   $[0\ 0\ 0\ 0\ 0\ 0\ 0\ 0\ 0\ 0\ 0]$   
 $[0\ 0\ 0\ 1\ -1\ 0\ 0\ 0\ 0\ 0\ 0]$   $[0\ 0\ 0\ 0\ 0\ 0\ 0\ 0\ 0\ 0\ 0]$   
 ...  
 $[0\ 0\ 0\ 0\ 0\ 0\ 0\ 0\ 0\ 0\ 0]$   $[0\ 0\ 0\ 0\ 0\ 0\ 0\ 0\ 0\ 1\ -1]$

Figure 1

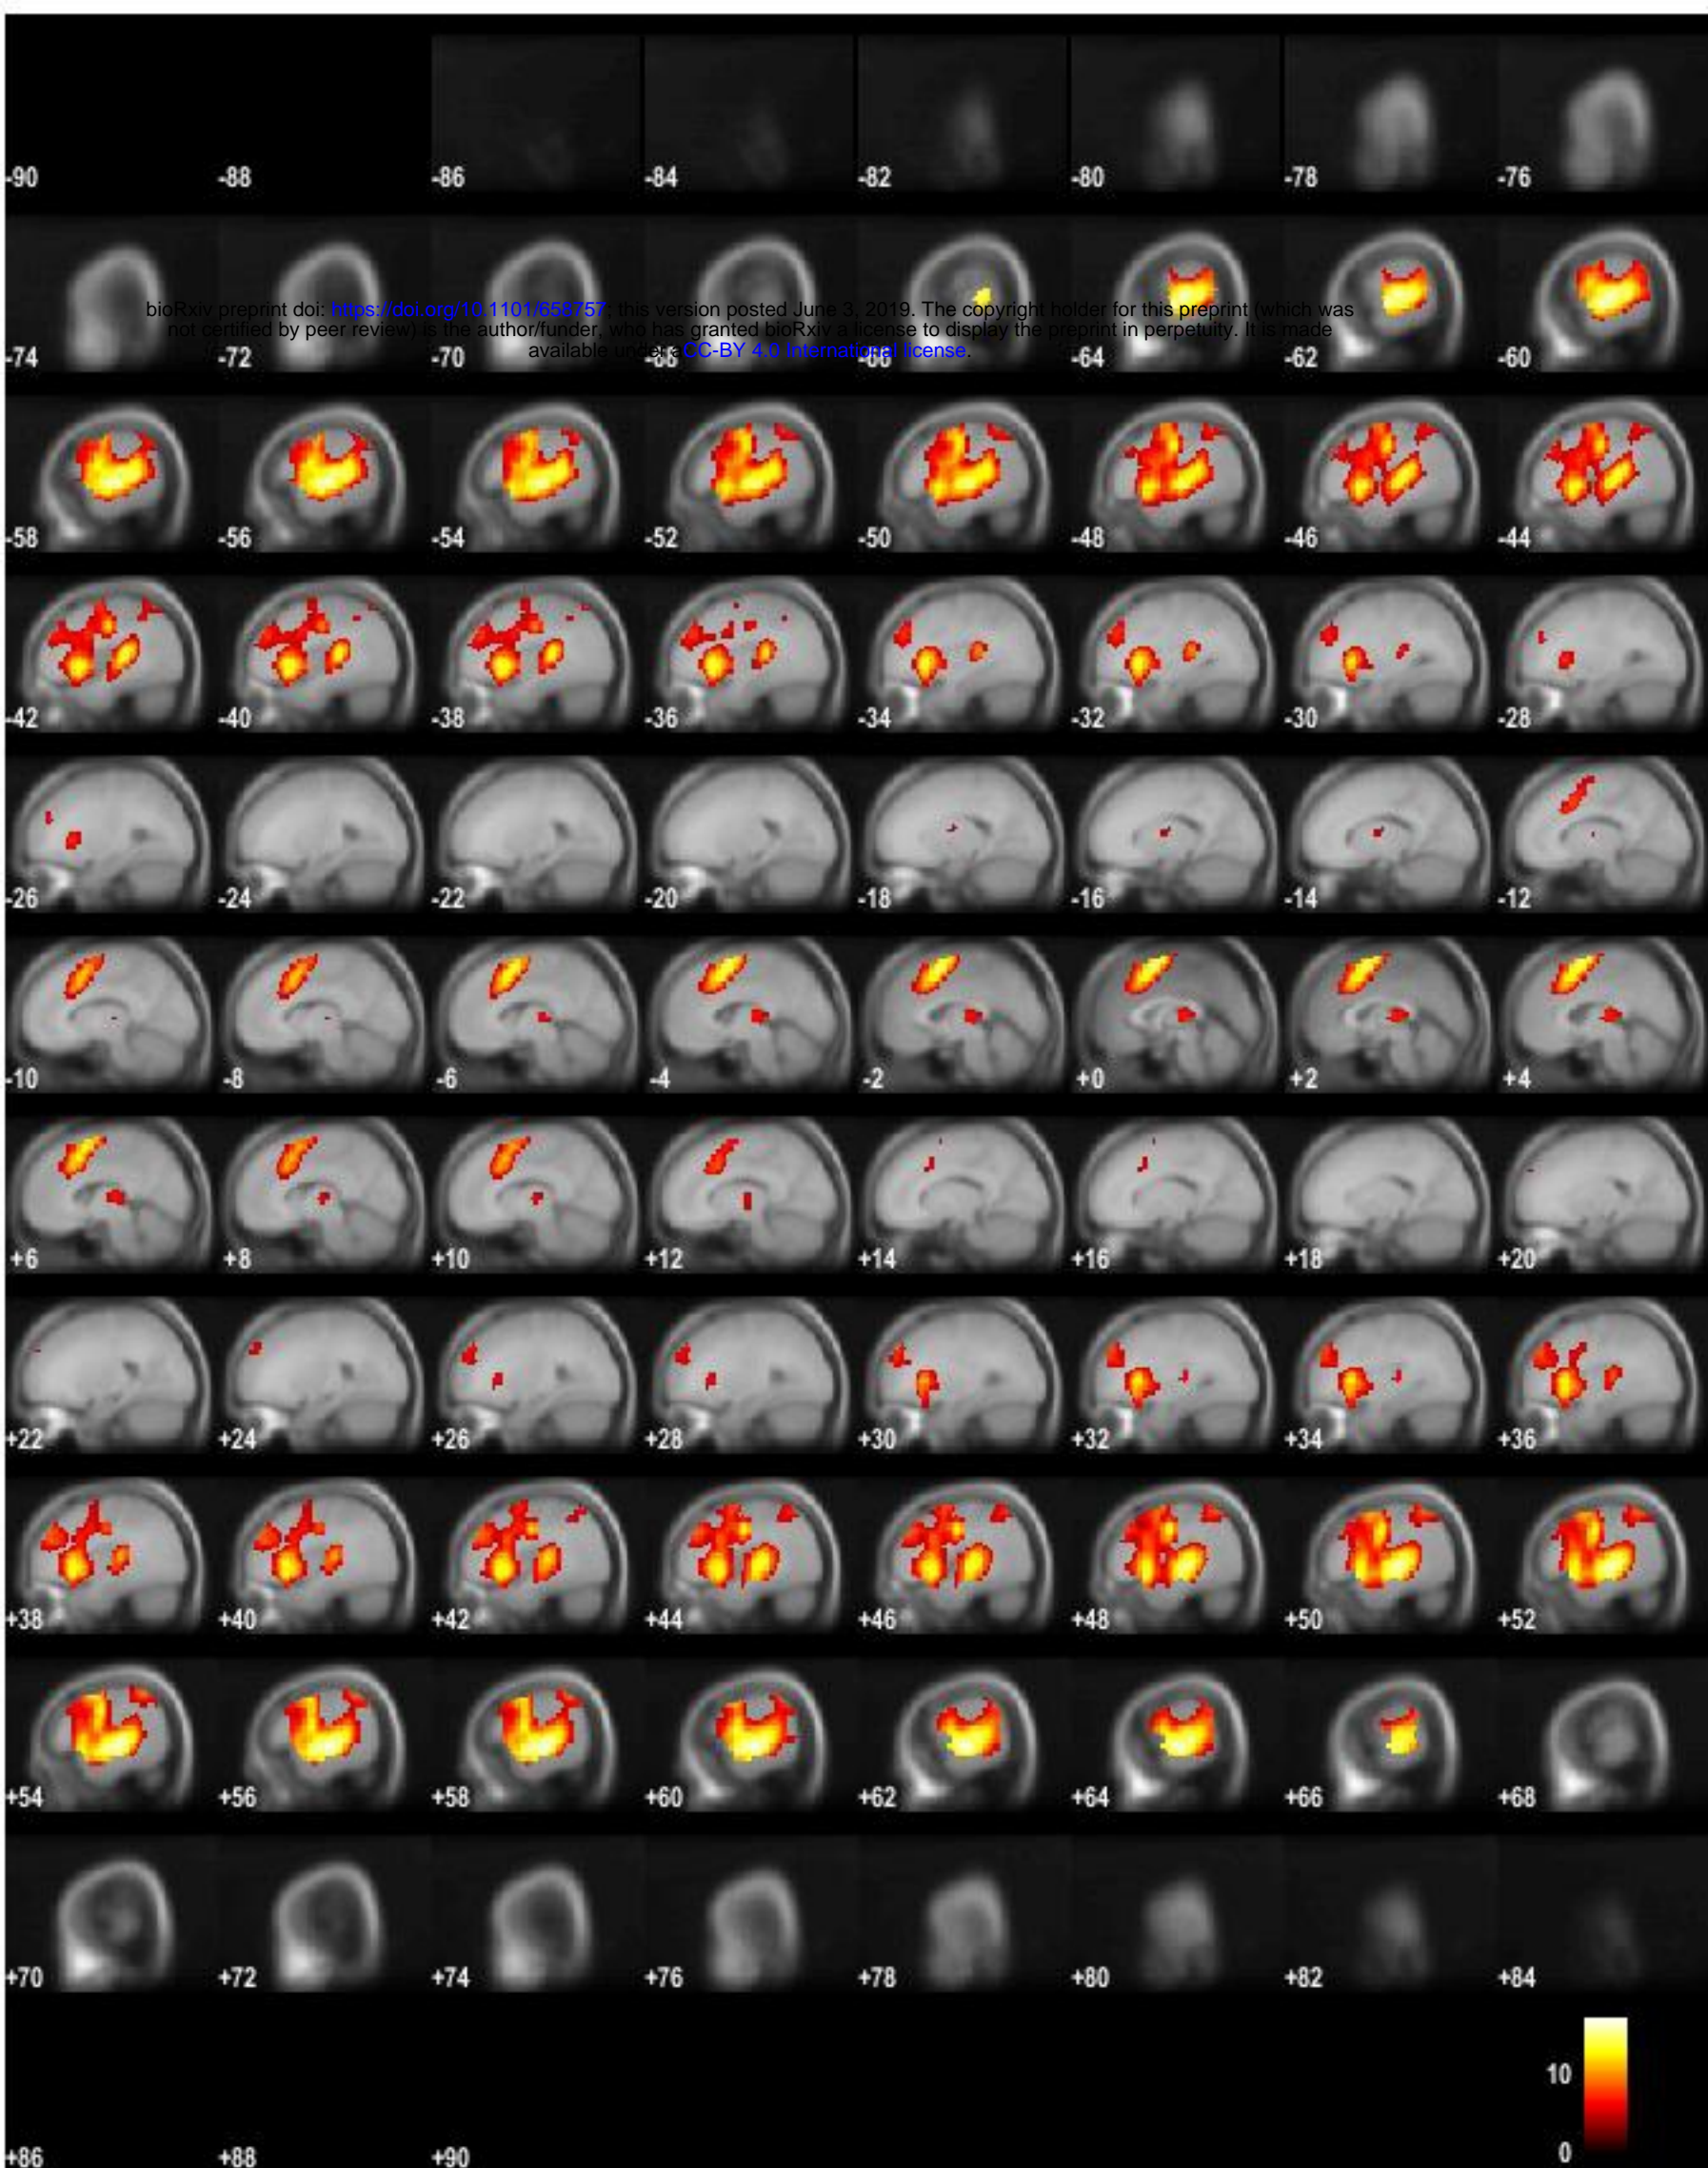

Figure 2a



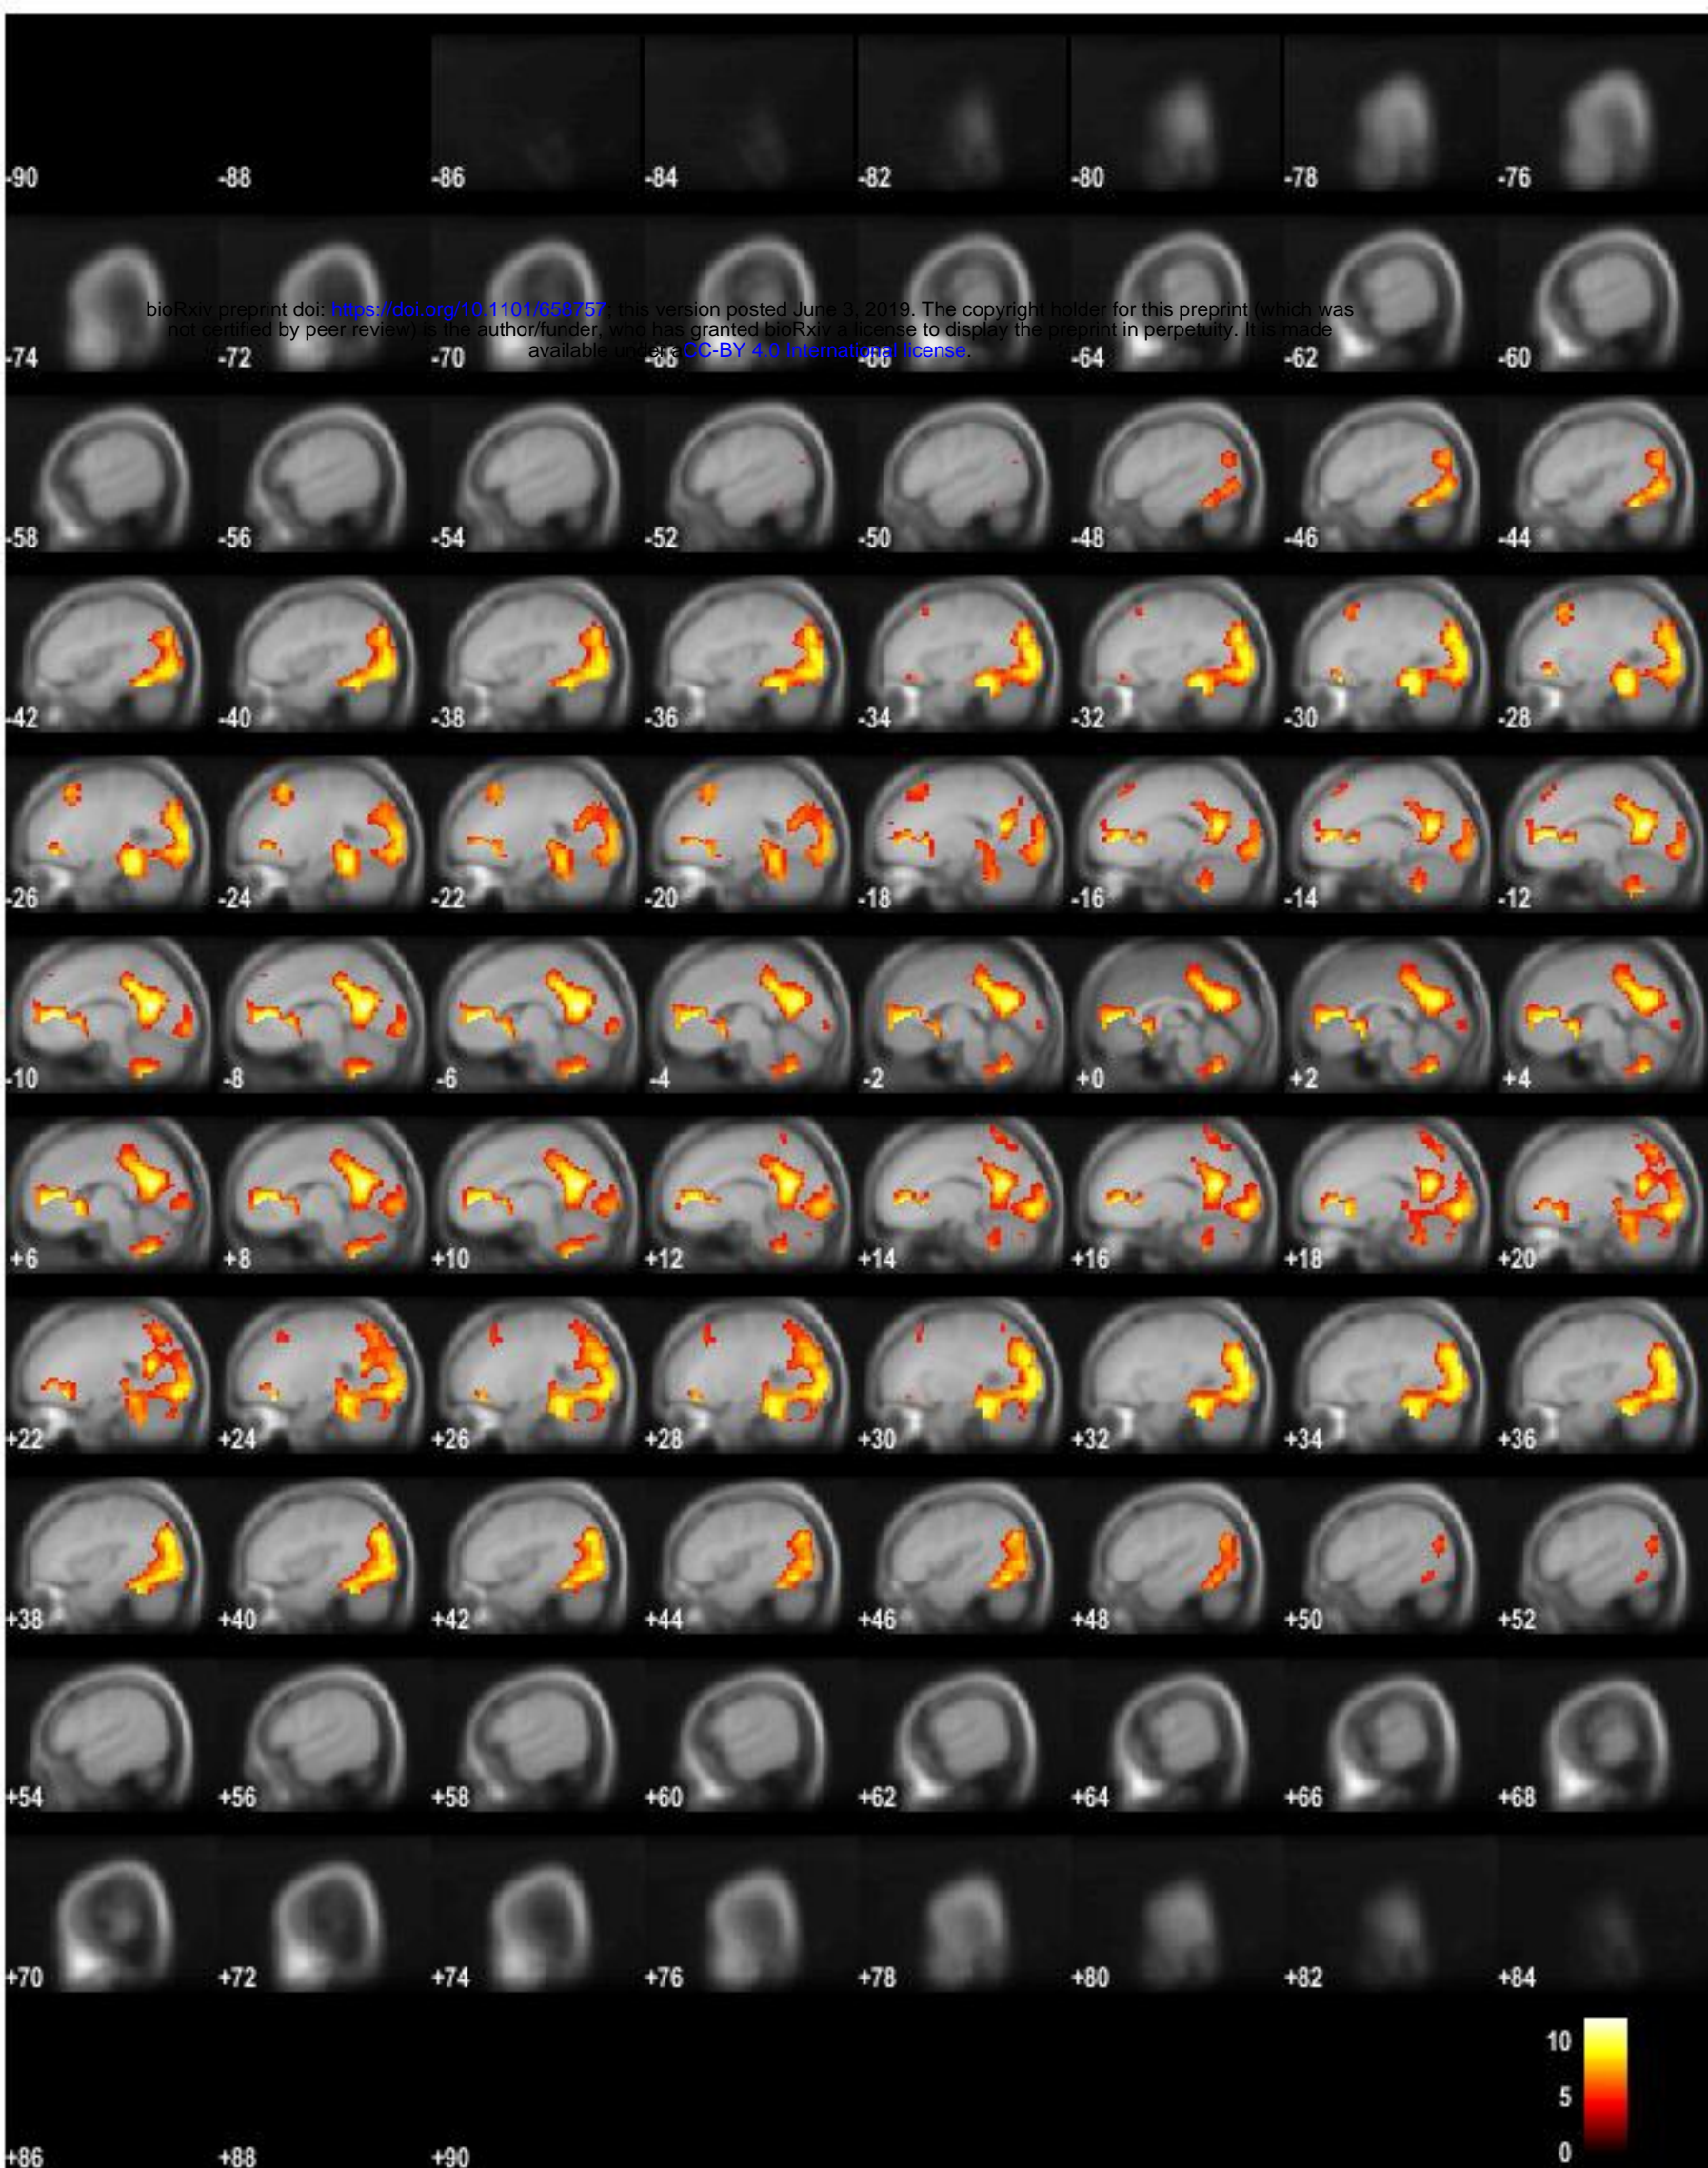

Figure 2b

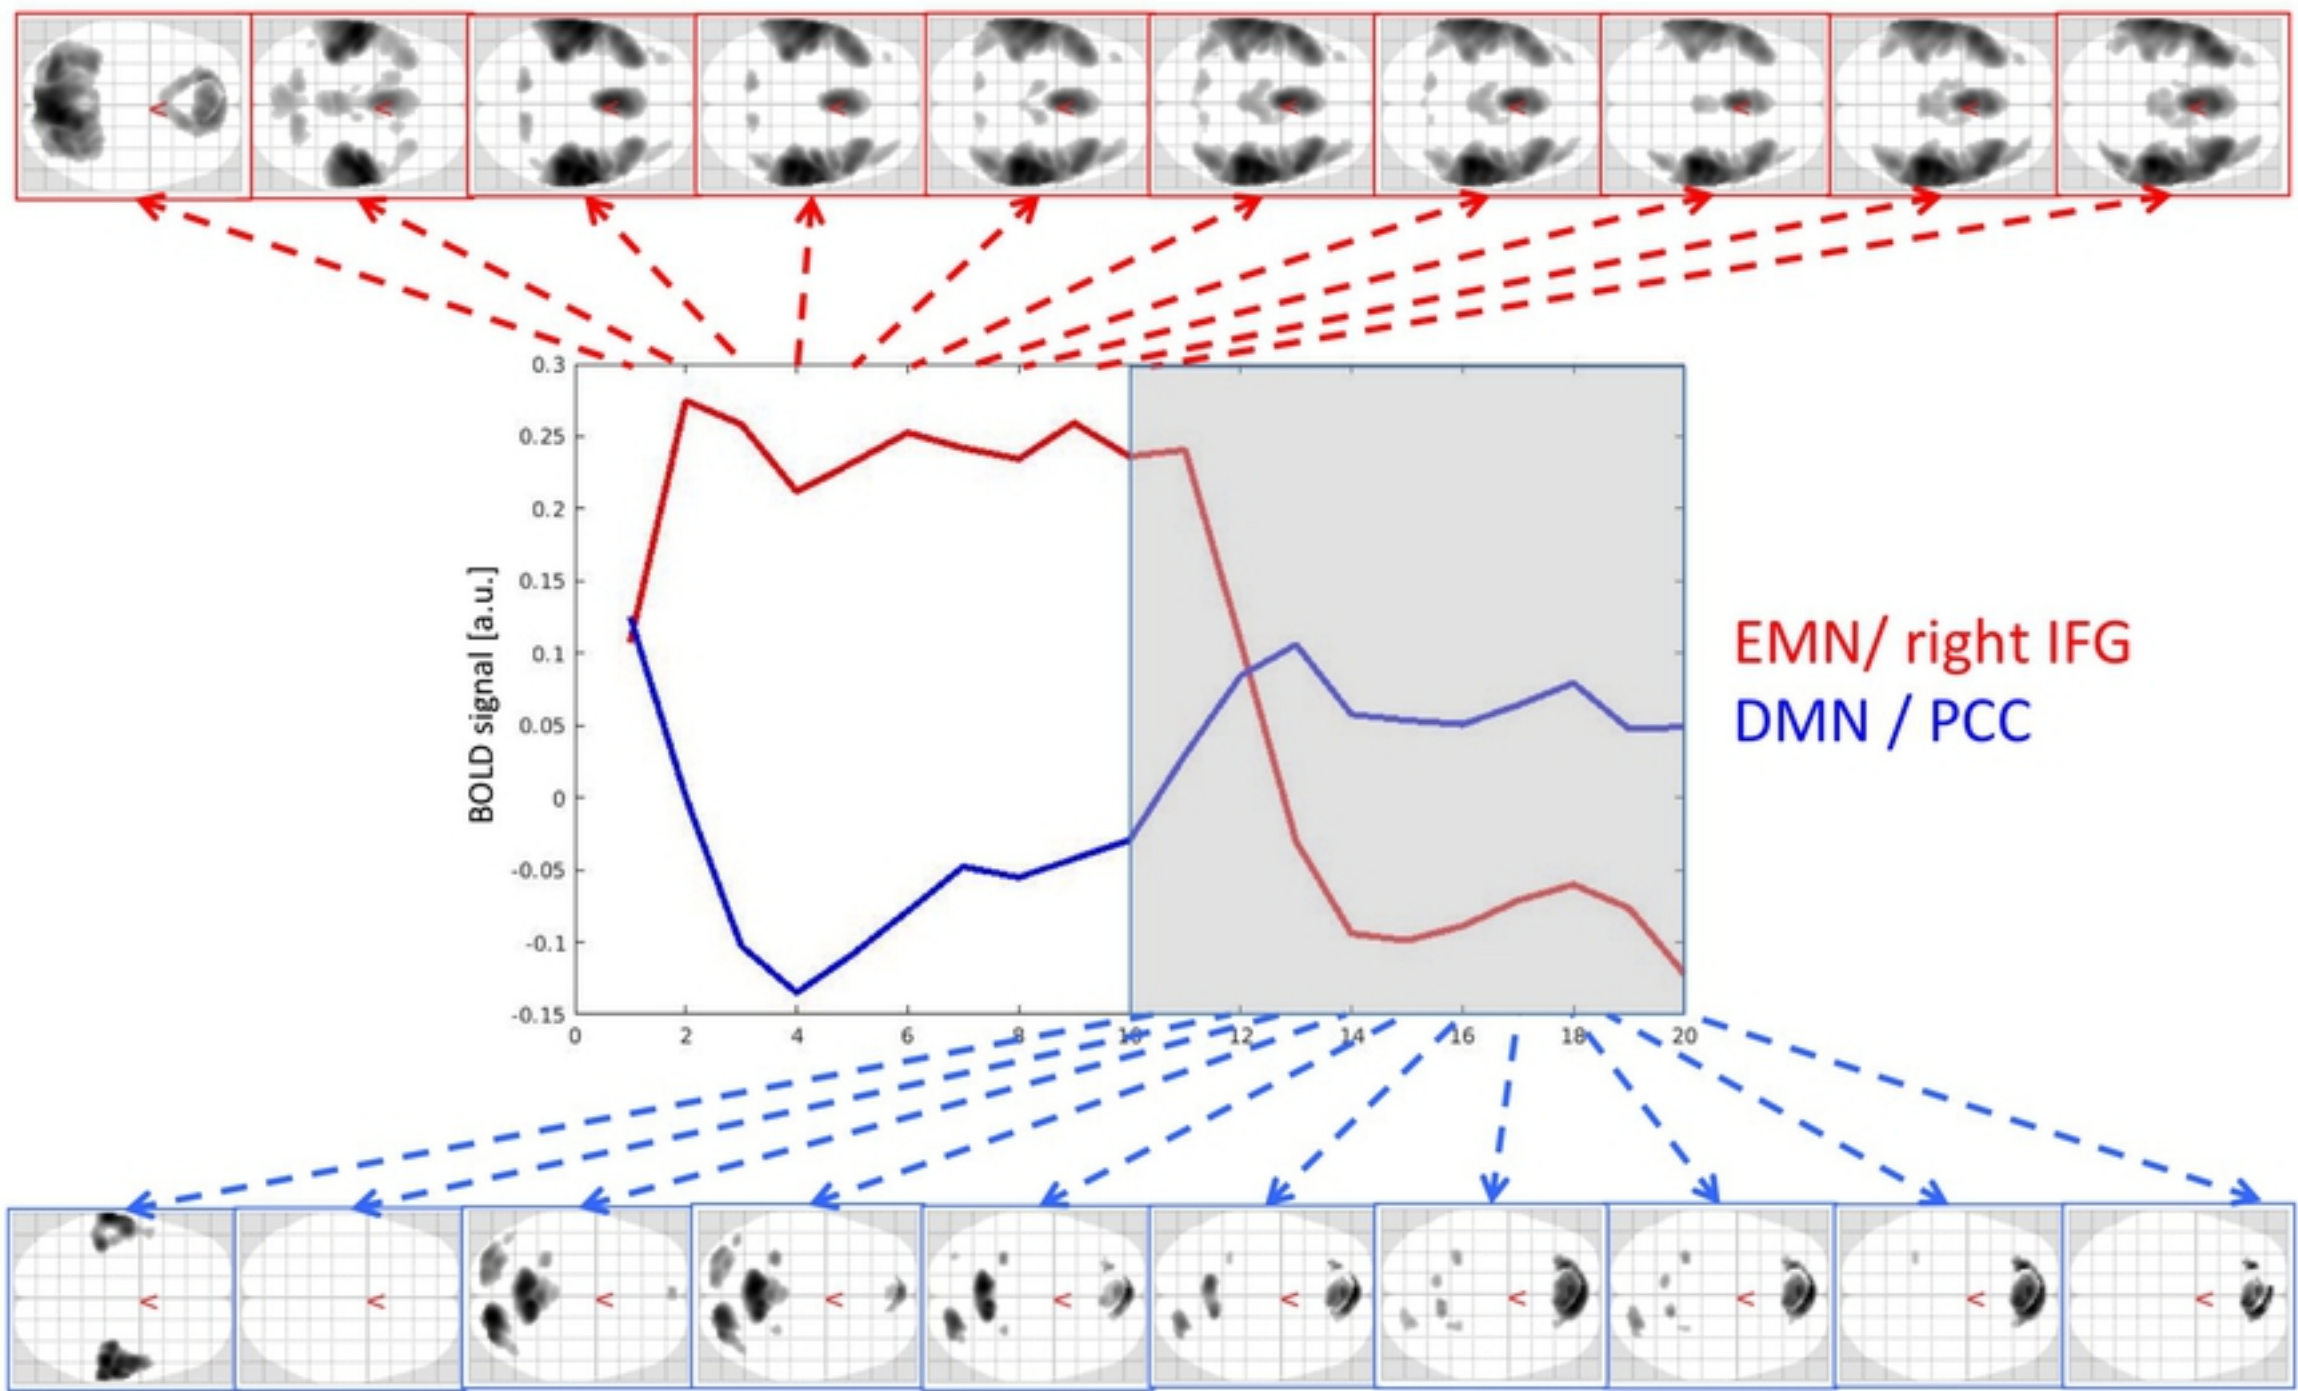

Figure 3



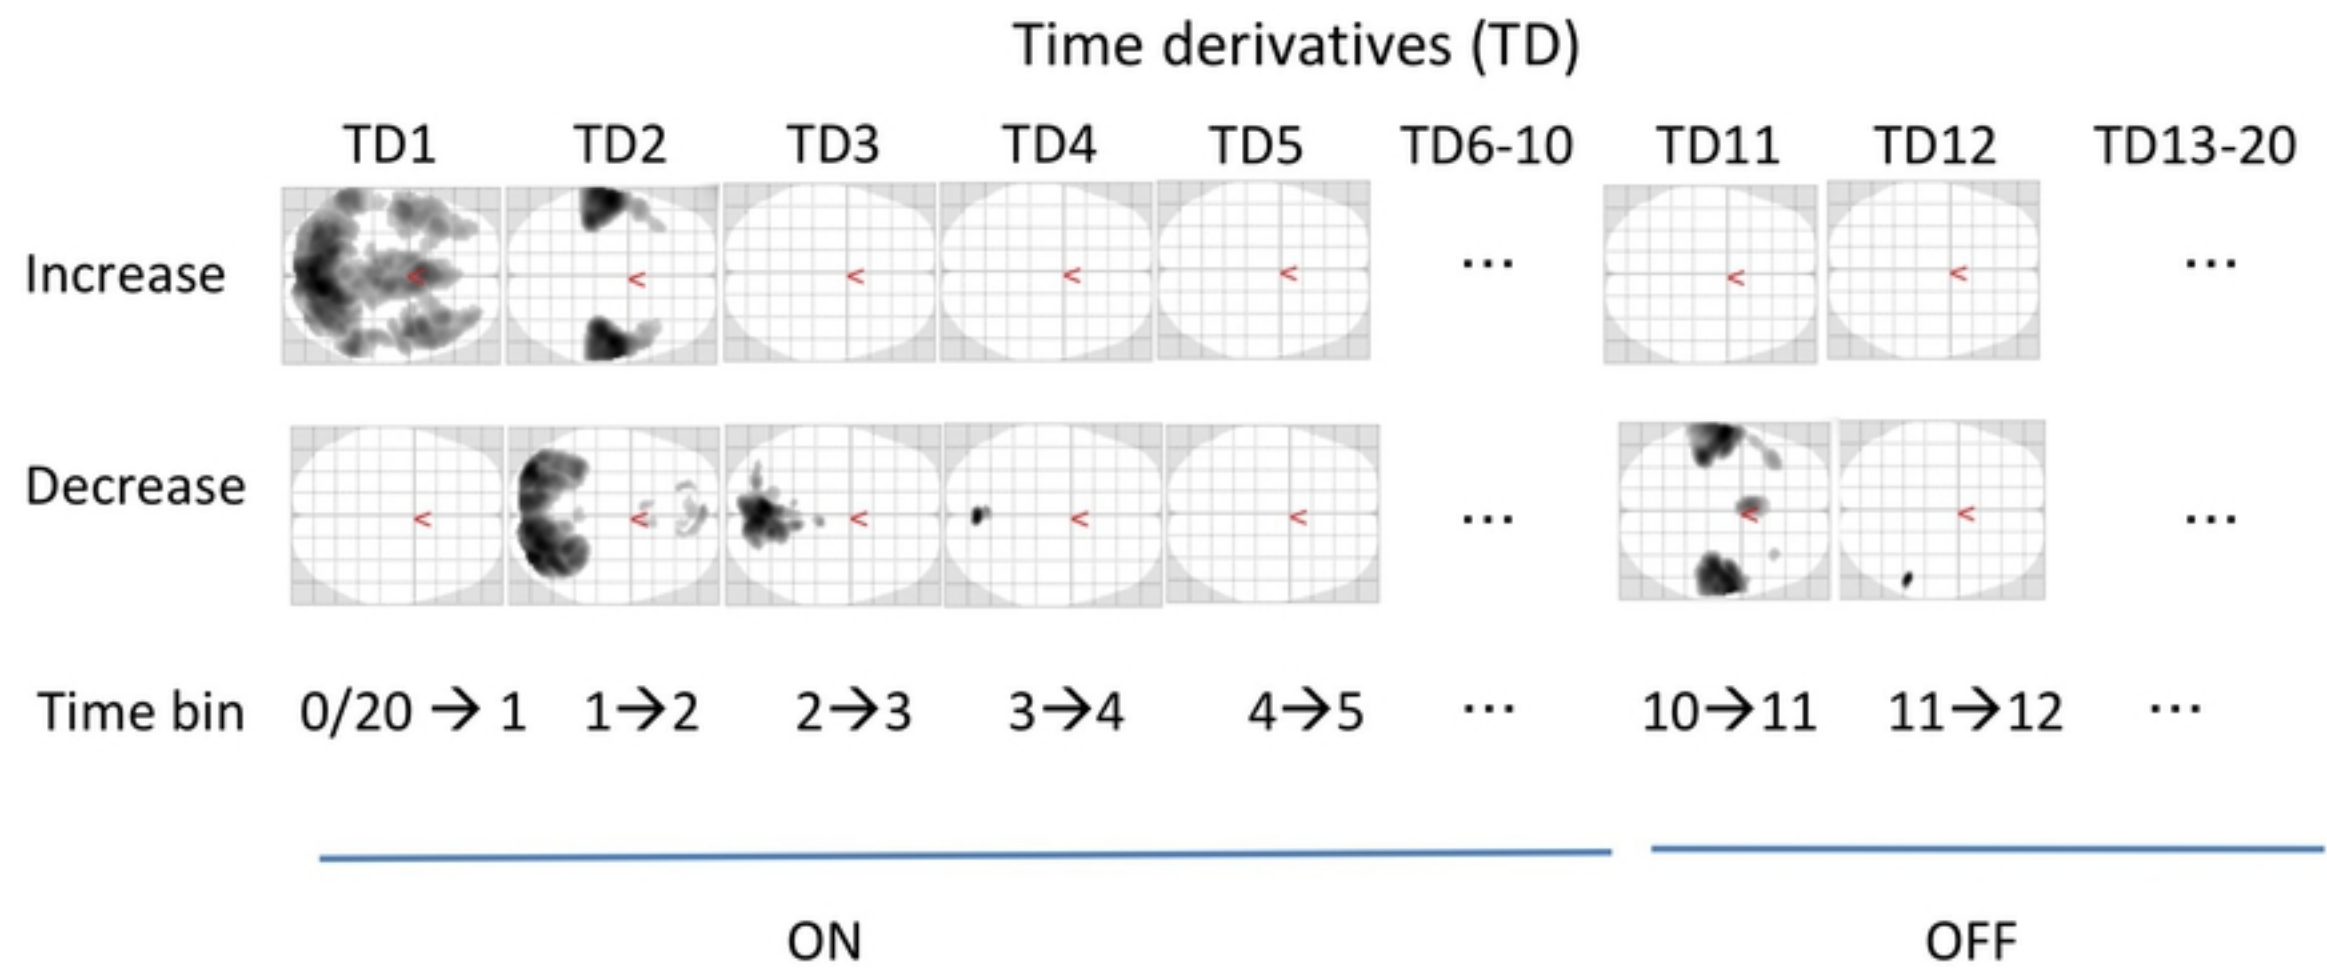

Figure 4
